# Supplementary material for: Emulsion template synthesis of all conducting polymer aerogels with superb adsorption capacity and enhanced electrochemical capacitance
Source: Royal Society of Chemistry journal article supplement (doi:10.1039/c2jm30565h), 2012-01-01
Supplement: c2jm30565h.pdf [file c2jm30565h.pdf]

**Supporting Information** for

**Emulsion template synthesis of all conducting polymer aerogels with superb adsorption capacity and enhanced electrochemical capacitance**

*Yangzi Xu, Zhuyin Sui, Bin Xu, Hui Duan and Xuotong Zhang\**

School of Materials Science & Engineering, Beijing Institute of Technology, Beijing 100081, P. R. China  
Research Institute of Chemical Defence, Beijing 100191, China

**Tables**

**Table SI1:** Conductivity of the resulting PEDOT-S/PEDOT hydrogels, aerogels and compressed dried pellets with different initial molar ratios of EDOT-S to EDOT

| Initial molar ratio of<br>EDOT-S to EDOT | Conductivity (S/m) |          |                          |
|------------------------------------------|--------------------|----------|--------------------------|
|                                          | Hydrogels          | Aerogels | Compressed Dried Pellets |
| 3:1                                      | 3.8                | 12.3     | 167.3                    |
| 1:3                                      | 3.5                | 10.5     | 726.8                    |

**Table SI2:** Porous properties of the resulting PEDOT-S/PEDOT aerogels

| Sample ID | Initial molar ratio of<br>EDOT-S to EDOT | Drying method | BET surface<br>area(m <sup>2</sup> /g) | Total pore<br>volumes(cm <sup>3</sup> /g) | Apparent density(g/cm <sup>3</sup> ) |
|-----------|------------------------------------------|---------------|----------------------------------------|-------------------------------------------|--------------------------------------|
| 1         | 3:1                                      | Supercritical | 216.39                                 | 0.67                                      | 0.1245                               |
| 2         | 1:1                                      | Supercritical | 69.02                                  | 0.182                                     | 0.0965                               |
| 3         | 1:1                                      | Freeze drying | 21.46                                  | 0.046                                     | --                                   |
| 4         | 1:3                                      | Supercritical | 68.49                                  | 0.166                                     | 0.1079                               |

## Figures

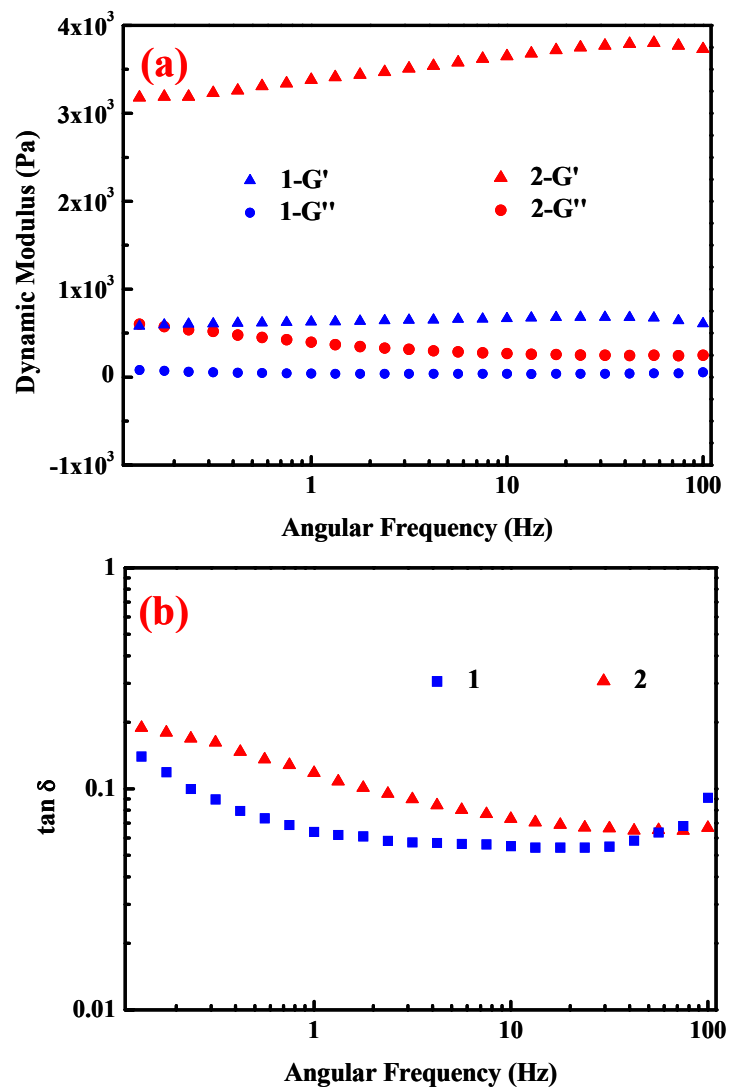

**Fig.S11** Rheological determination of the storage modulus ( $G'$ ), loss modulus ( $G''$ ) and the loss tangent ( $\tan \delta$ ) as the function of the angular frequency for the PEDOT-S/PEDOT hydrogels (“1” stands for hydrogel with the initial molar ratio of EDOT-S to EDOT 3:1; while “2” stands for hydrogel with the initial molar ratio of EDOT-S to EDOT 1:3

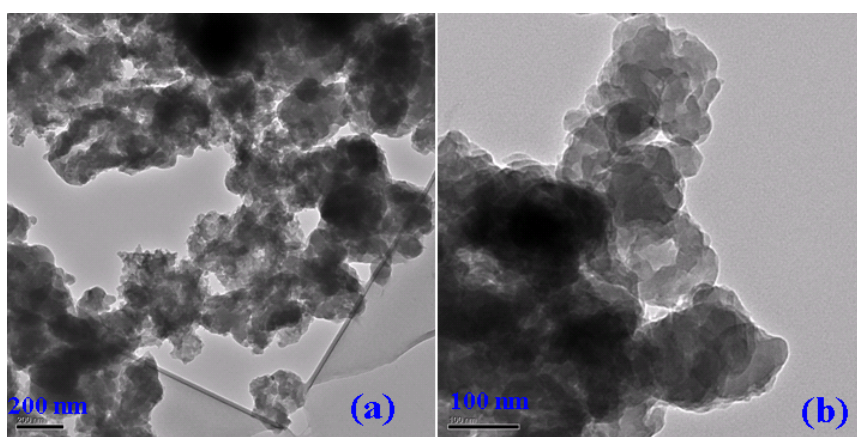

**Fig.SI2** TEM images of the resulting PEDOT-S/PEDOT aerogels with different magnification
